# Supplementary material
Source: Springer Nature journal article supplement (https://www.springermedizin.de/resource/supplementary/12958_2008_481_MOESM1_ESM.pdf/9568310)

Pattern "0"

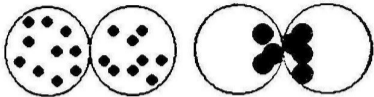

Pattern "other"

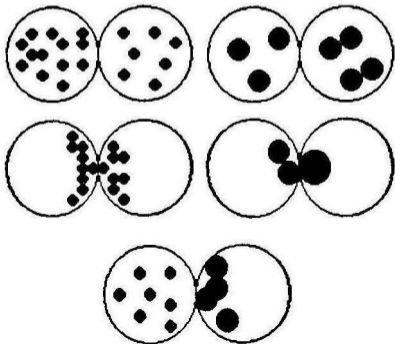

Supplement: MOESM1 [file 9568310]
